# Supplementary material for: Evaluation of Store Environment Changes of an In-Store Intervention to Promote Fruits and Vegetables in Latino/Hispanic-Focused Food Stores
Source: MDPI journal article supplement (doi:10.3390/ijerph17010065), 2019-12-20
Supplement: s1 [file s1]

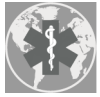

Supplementary Material 1: *El Valor de Nuestra Salud* (The Value of Our Health)  
point-of-purchase promotional materials

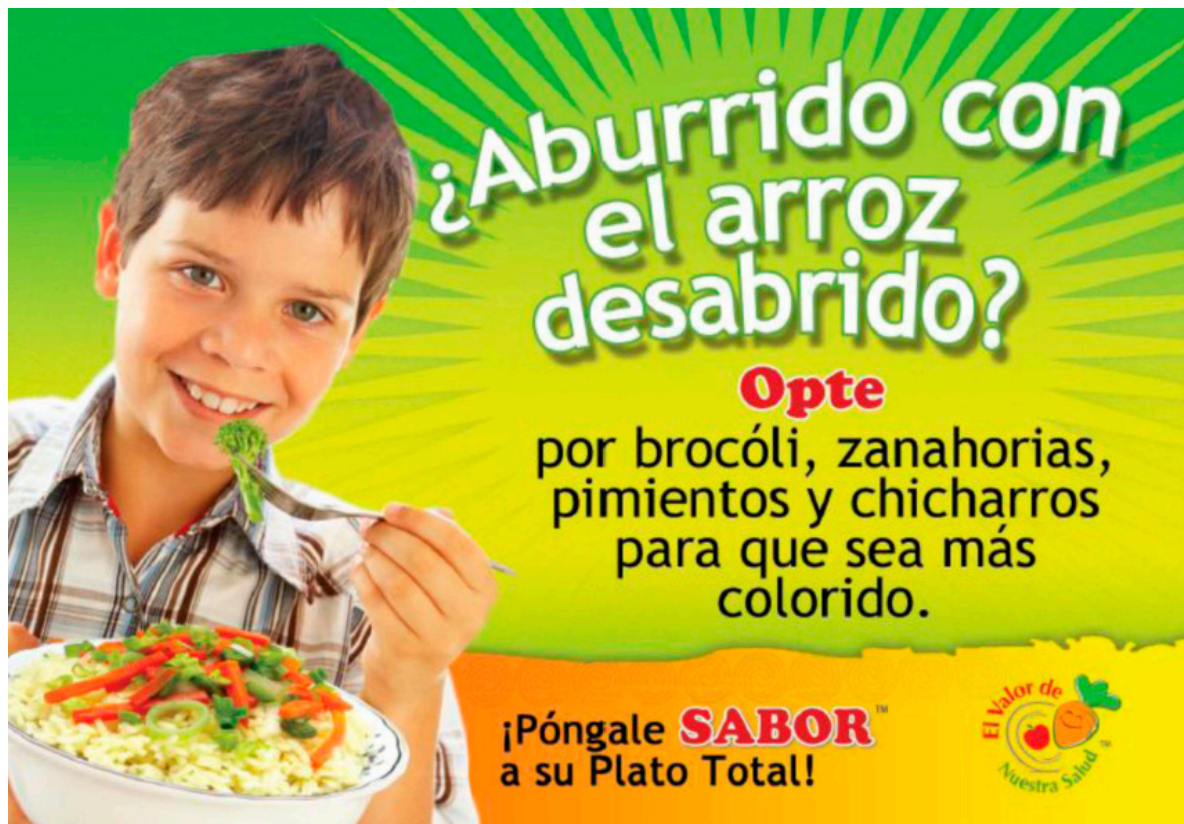

Figure 15. Shelf dangler

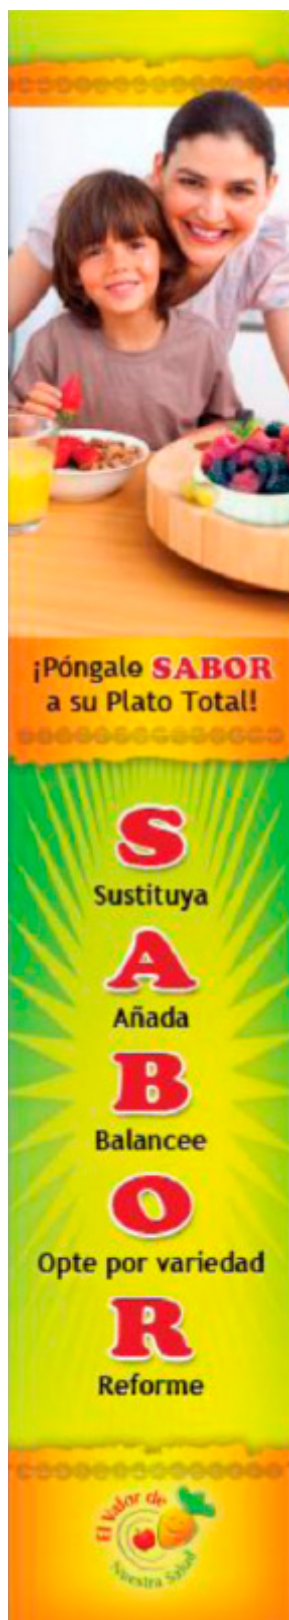

Figure 25: Aisle violator.
